# Supplementary material for: Tamper-Resistant Mobile Health Using Blockchain Technology
Source: PubMed Central journal article supplement (PMC5550736; doi:10.2196/mhealth.7938), 2017-07-26
Supplement: mhealth_v5i7e111_app1.pdf [file mhealth_v5i7e111_app1.pdf]

## Supplemental Data 1 The user data queried from the state in the normal data update

(a) The initial user data after the Deploy step. The user data for two days were registered to the state as the initial data. (b) The updated user data after the Invoke step. The user data for a day were added to the state. Newly added data were highlighted. The excerpt user data are shown in Figure 3.

(a)

```
{ "jsonrpc": "2.0", "result": { "status": "OK", "message": { "sleeps": [ { "awakeAt": 494888400, "outofBedAt": 494892000, "gotoBedAt": 494865000, "asleepAt": 494868600, "arousalCount": 1, "id": "\\\\CEC2DFFB-4C52-4B7D-A22C-65AC19E50FD6"}, { "awakeAt": 494975700, "outofBedAt": 494980200, "gotoBedAt": 494950500, "asleepAt": 494955000, "arousalCount": 2, "id": "\\\\B1118018-C548-4C84-8B93-9F45171C477B"} ], "esses": [ { "answers": [ 2, 2, 2, 2, 2, 2, 2 ], "date": 494939381 }, { "mistakeCount": 0, "ess": { "answers": [ 2, 2, 2, 2, 2, 2, 2 ], "date": 494939381 }, "reviewedEvening": true, "day_activity_check_items": 0, "msec": 0, "activities": [ { "id": 0, "title": "Sleep efficiency" }, { "id": 0, "title": "Sleep efficiency" } ], "date": 494938618, "reviewedMorning": false, "timestamp": 494938618, "lapseCount": 0, "depression": { "answers": [ 1, 1, 1, 0, 0, 1, 0, 1, 0, 1, 1, 0, 0, 1, 0, 0 ], "date": 494938903 }, "noSleep": false }, { "mistakeCount": 0, "ess": { "answers": [ 0, 0, 0, 0, 0, 0, 0 ], "date": 0 }, "reviewedEvening": false, "day_activity_check_items": 0, "msec": 0, "activities": null, "date": 494852218, "reviewedMorning": false, "timestamp": 494852218, "lapseCount": 0, "depression": { "answers": [ 0, 0, 0, 0, 0, 0, 0, 0, 0, 0, 0, 0, 0, 0, 0, 0 ], "date": 0 }, "noSleep": false }, { "mistakeCount": 0, "ess": { "answers": [ 0, 0, 0, 0, 0, 0, 0 ], "date": 0 }, "reviewedEvening": false, "day_activity_check_items": 0, "msec": 0, "activities": null, "date": 494765818, "reviewedMorning": false, "timestamp": 494765818, "lapseCount": 0, "depression": { "answers": [ 0, 0, 0, 0, 0, 0, 0, 0, 0, 0, 0, 0, 0, 0, 0, 0 ], "date": 0 }, "noSleep": false }, { "mistakeCount": 0, "ess": { "answers": [ 0, 0, 0, 0, 0, 0, 0 ], "date": 0 }, "reviewedEvening": false, "day_activity_check_items": 0, "msec": 0, "activities": null, "date": 494679418, "reviewedMorning": false, "timestamp": 494679418, "lapseCount": 0, "depression": { "answers": [ 0, 0, 0, 0, 0, 0, 0, 0, 0, 0, 0, 0, 0, 0, 0, 0 ], "date": 0 }, "noSleep": false }, { "mistakeCount": 0, "ess": { "answers": [ 0, 0, 0, 0, 0, 0, 0 ], "date": 0 }, "reviewedEvening": false, "day_activity_check_items": 0, "msec": 0, "activities": null, "date": 494593018, "reviewedMorning": false, "timestamp": 494593018, "lapseCount": 0, "depression": { "answers": [ 0, 0, 0, 0, 0, 0, 0, 0, 0, 0, 0, 0, 0, 0, 0, 0 ], "date": 0 }, "noSleep": false }, { "mistakeCount": 0, "ess": { "answers": [ 0, 0, 0, 0, 0, 0, 0 ], "date": 0 }, "reviewedEvening": false, "day_activity_check_items": 0, "msec": 0, "activities": null, "date": 494506618, "reviewedMorning": false, "timestamp": 494506618, "lapseCount": 0, "depression": { "answers": [ 0, 0, 0, 0, 0, 0, 0, 0, 0, 0, 0, 0, 0, 0, 0, 0 ], "date": 0 }, "noSleep": false }, { "mistakeCount": 0, "ess": { "answers": [ 0, 0, 0, 0, 0, 0, 0 ], "date": 0 }, "reviewedEvening": false, "day_activity_check_items": 0, "msec": 0, "activities": null, "date": 494420218, "reviewedMorning": false, "timestamp": 494420218, "lapseCount": 0, "depression": { "answers": [ 0, 0, 0, 0, 0, 0, 0, 0, 0, 0, 0, 0, 0, 0, 0, 0 ], "date": 0 }, "noSleep": false }, { "mistakeCount": 0, "ess": { "answers": [ 0, 0, 0, 0, 0, 0, 0 ], "date": 0 }, "reviewedEvening": false, "day_activity_check_items": 0, "msec": 0, "activities": null, "date": 494333818, "reviewedMorning": false, "timestamp": 494333818, "lapseCount": 0, "depression": { "answers": [ 0, 0, 0, 0, 0, 0, 0, 0, 0, 0, 0, 0, 0, 0, 0, 0 ], "date": 0 }, "noSleep": false } ], "build": { "build_version_80": 494939250, "build_version_83": 495771269, "build_version_84": 496221360 }, "goals": [ { "arouseMinute": 0, "arouseHour": 7, "sleepHour": 23, "sleepMinute": 0, "startOn": 493210869 }, { "aises": [ ], "depressions": [ { "answers": [ 1, 1, 1, 0, 0, 1, 0, 1, 0, 1, 1, 0, 0, 1, 0, 0 ], "date": 494938903 }, { "id": 0, "title": "Sleep efficiency" }, { "id": 0, "title": "Sleep efficiency" }, { "id": 0, "title": "Reviewing of sleep" }, { "id": 0, "title": "Reviewing of sleep" }, { "id": 0, "title": "Recording of sleep" } ], "timeInfo": { "created": 0, "updated": 0 }, "user": { "startedOn": 494938701, "gender": 2, "id": "DS0010-1", "medicineDescription": "Abc", "stature": 160, "age": 25, "weight": 50, "usingMedicine": true, "actigraphId": "0123456", "initialAisScore": 10 } }, "id": 5 }
```

(b)

```
{\"jsonrpc\":\"2.0\",\"result\":{\"status\":\"OK\",\"message\":{\"sleeps\":[{\"awakeAt\":494888400,\"outofBedAt\":494892000,\"gotoBedAt\":494865000,\"asleepAt\":494868600,\"arousalCount\":1,\"id\":\"CEC2DFFB-4C52-4B7D-A22C-65AC19E50FD6\"},{\"awakeAt\":494975700,\"outofBedAt\":494980200,\"gotoBedAt\":494950500,\"asleepAt\":494955000,\"arousalCount\":2,\"id\":\"B1118018-C548-4C84-8B93-9F45171C477B\"},{\"awakeAt\":495578700,\"outofBedAt\":495581400,\"gotoBedAt\":495558000,\"asleepAt\":495560700,\"arousalCount\":0,\"id\":\"37E725CF-C142-44AE-9F9D-FBD859355874\"}],\"esses\":[{\"answers\":[2,2,2,2,2,2,2,2],\"date\":494939381},{\"answers\":[2,2,2,3,2,0,2,0],\"date\":495634532}],\"days\":[{\"mistakeCount\":0,\"ess\":{\"answers\":[2,2,2,2,2,2,2,2],\"date\":494939381},\"reviewedEvening\":true,\"day_activity_check_items\":0,\"msec\":0,\"activities\":[{\"id\":0,\"title\":\"Sleep efficiency\"},{\"id\":0,\"title\":\"Sleep efficiency\"}],\"date\":494938618,\"reviewedMorning\":false,\"timestamp\":494938618,\"lapseCount\":0,\"depression\":{\"answers\":[1,1,1,0,0,1,0,1,0,1,0,0,1,0,0],\"date\":494938903},\"noSleep\":false},{\"mistakeCount\":0,\"ess\":{\"answers\":[0,0,0,0,0,0,0,0],\"date\":0},\"reviewedEvening\":false,\"day_activity_check_items\":0,\"msec\":0,\"activities\":null,\"date\":494852218,\"reviewedMorning\":false,\"timestamp\":494852218,\"lapseCount\":0,\"depression\":{\"answers\":[0,0,0,0,0,0,0,0,0,0,0,0,0,0,0],\"date\":0},\"noSleep\":false},{\"mistakeCount\":0,\"ess\":{\"answers\":[0,0,0,0,0,0,0,0],\"date\":0},\"reviewedEvening\":false,\"day_activity_check_items\":0,\"msec\":0,\"activities\":null,\"date\":494765818,\"reviewedMorning\":false,\"timestamp\":494765818,\"lapseCount\":0,\"depression\":{\"answers\":[0,0,0,0,0,0,0,0,0,0,0,0,0,0,0],\"date\":0},\"noSleep\":false},{\"mistakeCount\":0,\"ess\":{\"answers\":[0,0,0,0,0,0,0,0],\"date\":0},\"reviewedEvening\":false,\"day_activity_check_items\":0,\"msec\":0,\"activities\":null,\"date\":494679418,\"reviewedMorning\":false,\"timestamp\":494679418,\"lapseCount\":0,\"depression\":{\"answers\":[0,0,0,0,0,0,0,0,0,0,0,0,0,0,0],\"date\":0},\"noSleep\":false},{\"mistakeCount\":0,\"ess\":{\"answers\":[0,0,0,0,0,0,0,0],\"date\":0},\"reviewedEvening\":false,\"day_activity_check_items\":0,\"msec\":0,\"activities\":null,\"date\":494593018,\"reviewedMorning\":false,\"timestamp\":494593018,\"lapseCount\":0,\"depression\":{\"answers\":[0,0,0,0,0,0,0,0,0,0,0,0,0,0,0],\"date\":0},\"noSleep\":false},{\"mistakeCount\":0,\"ess\":{\"answers\":[0,0,0,0,0,0,0,0],\"date\":0},\"reviewedEvening\":false,\"day_activity_check_items\":0,\"msec\":0,\"activities\":null,\"date\":494506618,\"reviewedMorning\":false,\"timestamp\":494506618,\"lapseCount\":0,\"depression\":{\"answers\":[0,0,0,0,0,0,0,0,0,0,0,0,0,0,0],\"date\":0},\"noSleep\":false},{\"mistakeCount\":0,\"ess\":{\"answers\":[0,0,0,0,0,0,0,0],\"date\":0},\"reviewedEvening\":false,\"day_activity_check_items\":0,\"msec\":0,\"activities\":null,\"date\":494420218,\"reviewedMorning\":false,\"timestamp\":494420218,\"lapseCount\":0,\"depression\":{\"answers\":[0,0,0,0,0,0,0,0,0,0,0,0,0,0,0],\"date\":0},\"noSleep\":false},{\"mistakeCount\":0,\"ess\":{\"answers\":[0,0,0,0,0,0,0,0],\"date\":0},\"reviewedEvening\":false,\"day_activity_check_items\":0,\"msec\":0,\"activities\":null,\"date\":494333818,\"reviewedMorning\":false,\"timestamp\":494333818,\"lapseCount\":0,\"depression\":{\"answers\":[0,0,0,0,0,0,0,0,0,0,0,0,0,0,0],\"date\":0},\"noSleep\":false},{\"mistakeCount\":0,\"ess\":{\"answers\":[0,0,0,0,0,0,0,0],\"date\":0},\"reviewedEvening\":false,\"day_activity_check_items\":0,\"msec\":0,\"activities\":null,\"date\":494247418,\"reviewedMorning\":false,\"timestamp\":494247418,\"lapseCount\":0,\"depression\":{\"answers\":[0,0,0,0,0,0,0,0,0,0,0,0,0,0,0],\"date\":0},\"noSleep\":false}],\"build\":{\"build_version_80\":494939250,\"build_version_83\":495771269,\"build_version_84\":496221360},\"goals\":[{\"arouseMinute\":0,\"arouseHour\":7,\"sleepHour\":23,\"sleepMinute\":0,\"startOn\":493210869}],\"aises\":[],\"depressions\":[{\"answers\":[1,1,1,0,0,1,0,1,0,1,0,0,1,0,0],\"date\":494938903}],\"activities\":[{\"id\":0,\"title\":\"Sleep efficiency\"},{\"id\":0,\"title\":\"Sleep efficiency\"},{\"id\":0,\"title\":\"Reviewing of sleep\"},{\"id\":0,\"title\":\"Reviewing of sleep\"},{\"id\":0,\"title\":\"Recording of sleep\"},{\"id\":0,\"title\":\"Sleep efficiency\"},{\"id\":0,\"title\":\"Sleepiness in the daytime\"}],\"timeInfo\":{\"createdAt\":0,\"updatedAt\":0},\"user\":{\"startedOn\":494938701,\"gender\":2,\"id\":\"DS0010-1\",\"medicineDescription\":\"Abc\",\"stature\":160,\"age\":25,\"weight\":50,\"usingMedicine\":true,\"actigraphId\":\"0123456\",\"initialAisScore\":10}},\"id\":5}
```
