# Supplementary material for: Tamper-Resistant Mobile Health Using Blockchain Technology
Source: PubMed Central journal article supplement (PMC5550736; doi:10.2196/mhealth.7938), 2017-07-26
Supplement: mhealth_v5i7e111_app2.pdf [file mhealth_v5i7e111_app2.pdf]

**Supplemental Data 2 The user data queried from the state in the data update test when one of VPs was down**

**(a) The user data after the Invoke step when VP1 was down. (b) The user data after the Invoke step when VP1 was rebooted. The excerpt user data are shown in Figure 5.**

(a)

```
{\"jsonrpc\": \"2.0\", \"result\": {\"status\": \"OK\", \"message\": \"\", \"sleeps\": [{\"awakeAt\": 494888400, \"outofBedAt\": 494892000, \"gotoBedAt\": 494865000, \"asleepAt\": 494868600, \"arousalCount\": 1, \"id\": \"CEC2DFFB-4C52-4B7D-A22C-65AC19E50FD6\"}, {\"awakeAt\": 494975700, \"outofBedAt\": 494980200, \"gotoBedAt\": 494950500, \"asleepAt\": 494955000, \"arousalCount\": 2, \"id\": \"B1118018-C548-4C84-8B93-9F45171C477B\"}, {\"awakeAt\": 495578700, \"outofBedAt\": 495581400, \"gotoBedAt\": 495558000, \"asleepAt\": 495560700, \"arousalCount\": 0, \"id\": \"37E725CF-C142-44AE-9F9D-FBD859355874\"}, {\"awakeAt\": 495665100, \"outofBedAt\": 495668700, \"gotoBedAt\": 495645300, \"asleepAt\": 495648900, \"arousalCount\": 0, \"id\": \"77409D68-1F8E-4202-9436-A0CB4508246F\"}], \"esses\": [{\"answers\": [2, 2, 2, 2, 2, 2, 2], \"date\": 494939381}, {\"answers\": [2, 2, 2, 3, 2, 0, 2, 0], \"date\": 495634532}, {\"answers\": [2, 2, 1, 3, 2, 0, 2, 0], \"date\": 496484154}], \"days\": [{\"mistakeCount\": 0, \"ess\": {\"answers\": [2, 2, 2, 2, 2, 2, 2], \"date\": 494939381}, \"reviewedEvening\": true, \"day_activity_check_items\": 0, \"msec\": 0, \"activities\": [{\"id\": 0, \"title\": \"Sleep efficiency\"}, {\"id\": 0, \"title\": \"Sleep efficiency\"}], \"date\": 494938618, \"reviewedMorning\": false, \"timestamp\": 494938618, \"lapseCount\": 0, \"depression\": {\"answers\": [1, 1, 1, 0, 0, 1, 0, 1, 0, 1, 0, 0, 1, 0, 0], \"date\": 494938903}, \"noSleep\": false, \"mistakeCount\": 0, \"ess\": {\"answers\": [0, 0, 0, 0, 0, 0, 0, 0], \"date\": 0}, \"reviewedEvening\": false, \"day_activity_check_items\": 0, \"msec\": 0, \"activities\": null, \"date\": 494852218, \"reviewedMorning\": false, \"timestamp\": 494852218, \"lapseCount\": 0, \"depression\": {\"answers\": [0, 0, 0, 0, 0, 0, 0, 0, 0, 0, 0, 0, 0, 0, 0], \"date\": 0}, \"noSleep\": false, \"mistakeCount\": 0, \"ess\": {\"answers\": [0, 0, 0, 0, 0, 0, 0], \"date\": 0}, \"reviewedEvening\": false, \"day_activity_check_items\": 0, \"msec\": 0, \"activities\": null, \"date\": 494765818, \"reviewedMorning\": false, \"timestamp\": 494765818, \"lapseCount\": 0, \"depression\": {\"answers\": [0, 0, 0, 0, 0, 0, 0, 0, 0, 0, 0, 0, 0, 0, 0], \"date\": 0}, \"noSleep\": false, \"mistakeCount\": 0, \"ess\": {\"answers\": [0, 0, 0, 0, 0, 0, 0], \"date\": 0}, \"reviewedEvening\": false, \"day_activity_check_items\": 0, \"msec\": 0, \"activities\": null, \"date\": 494679418, \"reviewedMorning\": false, \"timestamp\": 494679418, \"lapseCount\": 0, \"depression\": {\"answers\": [0, 0, 0, 0, 0, 0, 0, 0, 0, 0, 0, 0, 0, 0, 0], \"date\": 0}, \"noSleep\": false, \"mistakeCount\": 0, \"ess\": {\"answers\": [0, 0, 0, 0, 0, 0, 0], \"date\": 0}, \"reviewedEvening\": false, \"day_activity_check_items\": 0, \"msec\": 0, \"activities\": null, \"date\": 494593018, \"reviewedMorning\": false, \"timestamp\": 494593018, \"lapseCount\": 0, \"depression\": {\"answers\": [0, 0, 0, 0, 0, 0, 0, 0, 0, 0, 0, 0, 0, 0, 0], \"date\": 0}, \"noSleep\": false, \"mistakeCount\": 0, \"ess\": {\"answers\": [0, 0, 0, 0, 0, 0, 0], \"date\": 0}, \"reviewedEvening\": false, \"day_activity_check_items\": 0, \"msec\": 0, \"activities\": null, \"date\": 494506618, \"reviewedMorning\": false, \"timestamp\": 494506618, \"lapseCount\": 0, \"depression\": {\"answers\": [0, 0, 0, 0, 0, 0, 0, 0, 0, 0, 0, 0, 0, 0, 0], \"date\": 0}, \"noSleep\": false, \"mistakeCount\": 0, \"ess\": {\"answers\": [0, 0, 0, 0, 0, 0, 0], \"date\": 0}, \"reviewedEvening\": false, \"day_activity_check_items\": 0, \"msec\": 0, \"activities\": null, \"date\": 494420218, \"reviewedMorning\": false, \"timestamp\": 494420218, \"lapseCount\": 0, \"depression\": {\"answers\": [0, 0, 0, 0, 0, 0, 0, 0, 0, 0, 0, 0, 0, 0, 0], \"date\": 0}, \"noSleep\": false, \"mistakeCount\": 0, \"ess\": {\"answers\": [0, 0, 0, 0, 0, 0, 0], \"date\": 0}, \"reviewedEvening\": false, \"day_activity_check_items\": 0, \"msec\": 0, \"activities\": null, \"date\": 494333818, \"reviewedMorning\": false, \"timestamp\": 494333818, \"lapseCount\": 0, \"depression\": {\"answers\": [0, 0, 0, 0, 0, 0, 0, 0, 0, 0, 0, 0, 0, 0, 0], \"date\": 0}, \"noSleep\": false, \"mistakeCount\": 0, \"ess\": {\"answers\": [2, 2, 2, 3, 2, 0, 2, 0], \"date\": 495634532}, \"reviewedEvening\": true, \"day_activity_check_items\": 0, \"msec\": 492, \"activities\": [{\"id\": 0, \"title\": \"Reviewing of sleep\"}, {\"id\": 0, \"title\": \"Recording of sleep\"}, {\"id\": 0, \"title\": \"Sleep efficiency\"}, {\"id\": 0, \"title\": \"Sleepiness in the daytime\"}, {\"id\": 0, \"title\": \"Cognitive therapy\"}], \"date\": 495605869, \"reviewedMorning\": false, \"timestamp\": 495605869, \"lapseCount\": 7, \"depression\": {\"answers\": [0, 0, 0, 0, 0, 0, 0, 0, 0, 0, 0, 0, 0, 0, 0], \"date\": 0}, \"noSleep\": false}, \"build\": {\"build_version_80\": 494939250, \"build_version_83\": 495771269, \"build_version_84\": 496221360}, \"goals\": [{\"arouseMinute\": 0, \"arouseHour\": 7, \"sleepHour\": 23, \"sleepMinute\": 0, \"startOn\": 493210869}], \"aises\": [], \"depressions\": [{\"answers\": [1, 1, 1, 0, 0, 1, 0, 1, 0, 1, 0, 0, 1, 0, 0], \"date\": 494938903}], \"activities\": [{\"id\": 0, \"title\": \"Sleep efficiency\"}, {\"id\": 0, \"title\": \"Sleep efficiency\"}, {\"id\": 0, \"title\": \"Recording of sleep\"}, {\"id\": 0, \"title\": \"Recording of sleep\"}, {\"id\": 0, \"title\": \"Sleep efficiency\"}, {\"id\": 0, \"title\": \"Sleepiness in the daytime\"}, {\"id\": 0, \"title\": \"Cognitive therapy\"}, {\"id\": 0, \"title\": \"Reviewing of sleep\"}], \"timeInfo\": {\"createdAt\": 0, \"updatedAt\": 0}, \"user\": {\"startedOn\": 494938701, \"gender\": 2, \"id\": \"DS0010-1\", \"medicineDescription\": \"Abc\", \"stature\": 160, \"age\": 25, \"weight\": 50, \"usingMedicine\": true, \"actigraphId\": \"0123456\", \"initialAisScore\": 10}}, \"id\": 5}
```

(b)

```
{\"jsonrpc\":\"2.0\",\"result\":{\"status\":\"OK\",\"message\":{\"sleeps\":[{\"awakeAt\":494888400,\"outofBedAt\":494892000,\"gotoBedAt\":494865000,\"asleepAt\":494868600,\"arousalCount\":1,\"id\": \"CEC2DFFB-4C52-4B7D-A22C-65AC19E50FD6\"},{\"awakeAt\":494975700,\"outofBedAt\":494980200,\"gotoBedAt\":494950500,\"asleepAt\":494955000,\"arousalCount\":2,\"id\": \"B1118018-C548-4C84-8B93-9F45171C477B\"},{\"awakeAt\":495578700,\"outofBedAt\":495581400,\"gotoBedAt\":495558000,\"asleepAt\":495560700,\"arousalCount\":0,\"id\": \"37E725CF-C142-44AE-9F9D-FBD859355874\"},{\"awakeAt\":495665100,\"outofBedAt\":495668700,\"gotoBedAt\":495645300,\"asleepAt\":495648900,\"arousalCount\":0,\"id\": \"77409D68-1F8E-4202-9436-A0CB4508246F\"},{\"awakeAt\":495753300,\"outofBedAt\":495756900,\"gotoBedAt\":495730800,\"asleepAt\":495734400,\"arousalCount\":0,\"id\": \"697D9052-9F7D-4851-B724-D0868D722F29\"}],\"esses\":[{\"answers\":[2,2,2,2,2,2,2,2],\"date\":494939381},{\"answers\":[2,2,2,3,2,0,2,0],\"date\":495634532},{\"answers\":[2,2,1,3,2,0,2,0],\"date\":496484154},{\"answers\":[1,2,1,3,2,0,2,0],\"date\":496656633},{\"answers\":[1,1,1,3,2,1,1,0],\"date\":497527246}],\"days\":[{\"mistakeCount\":0,\"ess\":{\"answers\":[2,2,2,2,2,2,2,2],\"date\":494939381},\"reviewedEvening\":true,\"day_activity_check_items\":0,\"msec\":0,\"activities\":[{\"id\":0,\"title\":\"Sleep efficiency\"},{\"id\":0,\"title\":\"Sleep efficiency\"}],\"date\":494938618,\"reviewedMorning\":false,\"timestamp\":494938618,\"lapseCount\":0,\"depression\":{\"answers\":[1,1,1,0,0,1,0,1,0,1,1,0,0,1,0,0],\"date\":494938903},\"noSleep\":false,\"mistakeCount\":0,\"ess\":{\"answers\":[0,0,0,0,0,0,0,0],\"date\":0},\"reviewedEvening\":false,\"day_activity_check_items\":0,\"msec\":0,\"activities\":null,\"date\":494852218,\"reviewedMorning\":false,\"timestamp\":494852218,\"lapseCount\":0,\"depression\":{\"answers\":[0,0,0,0,0,0,0,0,0,0,0,0,0,0,0,0],\"date\":0},\"noSleep\":false,\"mistakeCount\":0,\"ess\":{\"answers\":[0,0,0,0,0,0,0,0],\"date\":0},\"reviewedEvening\":false,\"day_activity_check_items\":0,\"msec\":0,\"activities\":null,\"date\":494765818,\"reviewedMorning\":false,\"timestamp\":494765818,\"lapseCount\":0,\"depression\":{\"answers\":[0,0,0,0,0,0,0,0,0,0,0,0,0,0,0,0],\"date\":0},\"noSleep\":false,\"mistakeCount\":0,\"ess\":{\"answers\":[0,0,0,0,0,0,0,0],\"date\":0},\"reviewedEvening\":false,\"day_activity_check_items\":0,\"msec\":0,\"activities\":null,\"date\":494679418,\"reviewedMorning\":false,\"timestamp\":494679418,\"lapseCount\":0,\"depression\":{\"answers\":[0,0,0,0,0,0,0,0,0,0,0,0,0,0,0,0],\"date\":0},\"noSleep\":false,\"mistakeCount\":0,\"ess\":{\"answers\":[0,0,0,0,0,0,0,0],\"date\":0},\"reviewedEvening\":false,\"day_activity_check_items\":0,\"msec\":0,\"activities\":null,\"date\":494593018,\"reviewedMorning\":false,\"timestamp\":494593018,\"lapseCount\":0,\"depression\":{\"answers\":[0,0,0,0,0,0,0,0,0,0,0,0,0,0,0,0],\"date\":0},\"noSleep\":false,\"mistakeCount\":0,\"ess\":{\"answers\":[0,0,0,0,0,0,0,0],\"date\":0},\"reviewedEvening\":false,\"day_activity_check_items\":0,\"msec\":0,\"activities\":null,\"date\":494506618,\"reviewedMorning\":false,\"timestamp\":494506618,\"lapseCount\":0,\"depression\":{\"answers\":[0,0,0,0,0,0,0,0,0,0,0,0,0,0,0,0],\"date\":0},\"noSleep\":false,\"mistakeCount\":0,\"ess\":{\"answers\":[0,0,0,0,0,0,0,0],\"date\":0},\"reviewedEvening\":false,\"day_activity_check_items\":0,\"msec\":0,\"activities\":null,\"date\":494420218,\"reviewedMorning\":false,\"timestamp\":494420218,\"lapseCount\":0,\"depression\":{\"answers\":[0,0,0,0,0,0,0,0,0,0,0,0,0,0,0,0],\"date\":0},\"noSleep\":false,\"mistakeCount\":0,\"ess\":{\"answers\":[0,0,0,0,0,0,0,0],\"date\":0},\"reviewedEvening\":false,\"day_activity_check_items\":0,\"msec\":0,\"activities\":null,\"date\":494333818,\"reviewedMorning\":false,\"timestamp\":494333818,\"lapseCount\":0,\"depression\":{\"answers\":[0,0,0,0,0,0,0,0,0,0,0,0,0,0,0,0],\"date\":0},\"noSleep\":false,\"mistakeCount\":0,\"ess\":{\"answers\":[2,2,2,3,2,0,2,0],\"date\":495634532},\"reviewedEvening\":true,\"day_activity_check_items\":0,\"msec\":492,\"activities\":[{\"id\":0,\"title\":\"Reviewing of sleep\"},{\"id\":0,\"title\":\"Reviewing of sleep\"},{\"id\":0,\"title\":\"Recording of sleep\"},{\"id\":0,\"title\":\"Sleep efficiency\"},{\"id\":0,\"title\":\"Sleepiness in the daytime\"},{\"id\":0,\"title\":\"Cognitive therapy\"}],\"date\":495605869,\"reviewedMorning\":false,\"timestamp\":495605869,\"lapseCount\":7,\"depression\":{\"answers\":[0,0,0,0,0,0,0,0,0,0,0,0,0,0,0,0],\"date\":0},\"noSleep\":false,\"mistakeCount\":0,\"ess\":{\"answers\":[0,0,0,0,0,0,0,0],\"date\":0},\"reviewedEvening\":false,\"day_activity_check_items\":29167,\"msec\":0,\"activities\":[{\"id\":0,\"title\":\"Reviewing of sleep\"},{\"id\":0,\"title\":\"Reviewing of sleep\"},{\"id\":0,\"title\":\"Recording of sleep\"},{\"id\":0,\"title\":\"Sleep efficiency\"},{\"id\":0,\"title\":\"Sleepiness in the daytime\"},{\"id\":0,\"title\":\"Cognitive therapy\"},{\"id\":0,\"title\":\"Reviewing of sleep\"},{\"id\":0,\"title\":\"Reviewing of sleep\"},{\"id\":0,\"title\":\"Recording of sleep\"},{\"id\":0,\"title\":\"Reviewing of sleep\"},{\"id\":0,\"title\":\"Recording of sleep\"}],\"build\":{\"build_version_80\":0,\"build_version_83\":0,\"build_version_84\":0},\"goals\":null,\"aises\":[],\"depressions\":[{\"answers\":[1,1,1,0,0,1,0,1,0,1,0,0,1,0,0],\"date\":494938903}],\"activities\":[{\"id\":0,\"title\":\"Sleep efficiency\"},{\"id\":0,\"title\":\"Sleep efficiency\"},{\"id\":0,\"title\":\"Reviewing of sleep\"},{\"id\":0,\"title\":\"Reviewing of sleep\"},{\"id\":0,\"title\":\"Recording of sleep\"},{\"id\":0,\"title\":\"Sleep efficiency\"},{\"id\":0,\"title\":\"Sleepiness in the daytime\"},{\"id\":0,\"title\":\"Cognitive therapy\"},{\"id\":0,\"title\":\"Reviewing of sleep\"},{\"id\":0,\"title\":\"Reviewing of sleep\"},{\"id\":0,\"title\":\"Recording of sleep\"},{\"id\":0,\"title\":\"Reviewing of sleep\"},{\"id\":0,\"title\":\"Recording of sleep\"}]}]}
```
